# Supplementary material for: In Vitro Digested Nut Oils Attenuate the Lipopolysaccharide-Induced Inflammatory Response in Macrophages
Source: PubMed Central journal article supplement (PMC6471109; doi:10.3390/nu11030503), 2019-02-27
Supplement: nutrients-11-00503-s001.pdf [file nutrients-11-00503-s001.pdf]

1 Article

2

3 **Supplementary Material**

4 **Supplementary Table S1:** Primers used for RTq-PCR analyses in the present study. The primers of a  
5 pair are located in different exons.

| mRNA                         | Name                            | Forward primer/<br>Reverse primer [5' → 3']          |
|------------------------------|---------------------------------|------------------------------------------------------|
| <b>Cox2</b>                  | Cyclooxygenase 2                | TCCCTGAAGCCGTACACATCA/<br>TGGACGAGGTTTTTCCACCA       |
| <b>Il1<math>\beta</math></b> | Interleukin 1 $\beta$           | TGAAGTTGACGGACCCCAAA/<br>CAGCCACAATGAGTGATACTGCC     |
| <b>Il6</b>                   | Interleukin 6                   | TCAATTCCAGAAACCGCTATGAA/<br>GGAAGGCCGTGGTTGTCAC      |
| <b>iNos</b>                  | Inducible nitric oxide synthase | GAGCGAGGAGCAGGTGGAA/<br>CCATAGGAAAAGACTGCACCGA       |
| <b>Ppib</b>                  | Peptidylprolyl isomerase B      | AAACAGCAAGTTCCATCGTGTCAT/<br>GAAGCGCTCACCATAGATGCTCT |
| <b>Tnfa</b>                  | Tumor necrosis factor $\alpha$  | AGAAACACAAGATGCTGGGACAGT/<br>CCTTTCAGAACTCAGGAATGG   |

6
